# Supplementary material for: GPU-HADVPPM4HIP V1.0: using the heterogeneous-compute interface for portability (HIP) to speed up the piecewise parabolic method in the CAMx (v6.10) air quality model on China's domestic GPU-like accelerator
Source: Copernicus journal article supplement (doi:10.5194/gmd-17-6887-2024), 2024-09-13
Supplement: Supplementary file 1 [file gmd-17-6887-2024-supplement.pdf]

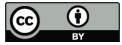

*Supplement of*

**GPU-HADVPPM4HIP V1.0: using the heterogeneous-compute interface for portability (HIP) to speed up the piecewise parabolic method in the CAMx (v6.10) air quality model on China’s domestic GPU-like accelerator**

**Kai Cao et al.**

*Correspondence to:* Qizhong Wu (wqizhong@bnu.edu.cn), Lingling Wang (928216422@qq.com), and Lanning Wang (wangln@bnu.edu.cn)

The copyright of individual parts of the supplement might differ from the article licence.

## Supplementary Material

**Figure S1.** O<sub>3</sub> concentrations outputted by CAMx model for Fortran (F), HIP C(HIP), and HIP C with OpenMP (HIP\_OMP) versions. Panels (a) is from Fortran version. Panels (b) is from HIP C version. Panels (c) is from HIP C with OpenMP version. Panels (d) is the output concentration differences of Fortran and HIP C versions. Panels (e) is the output concentration differences of HIP C and HIP C with OpenMP versions. Panels (f) is the output concentration differences of Fortran and HIP C with OpenMP versions.

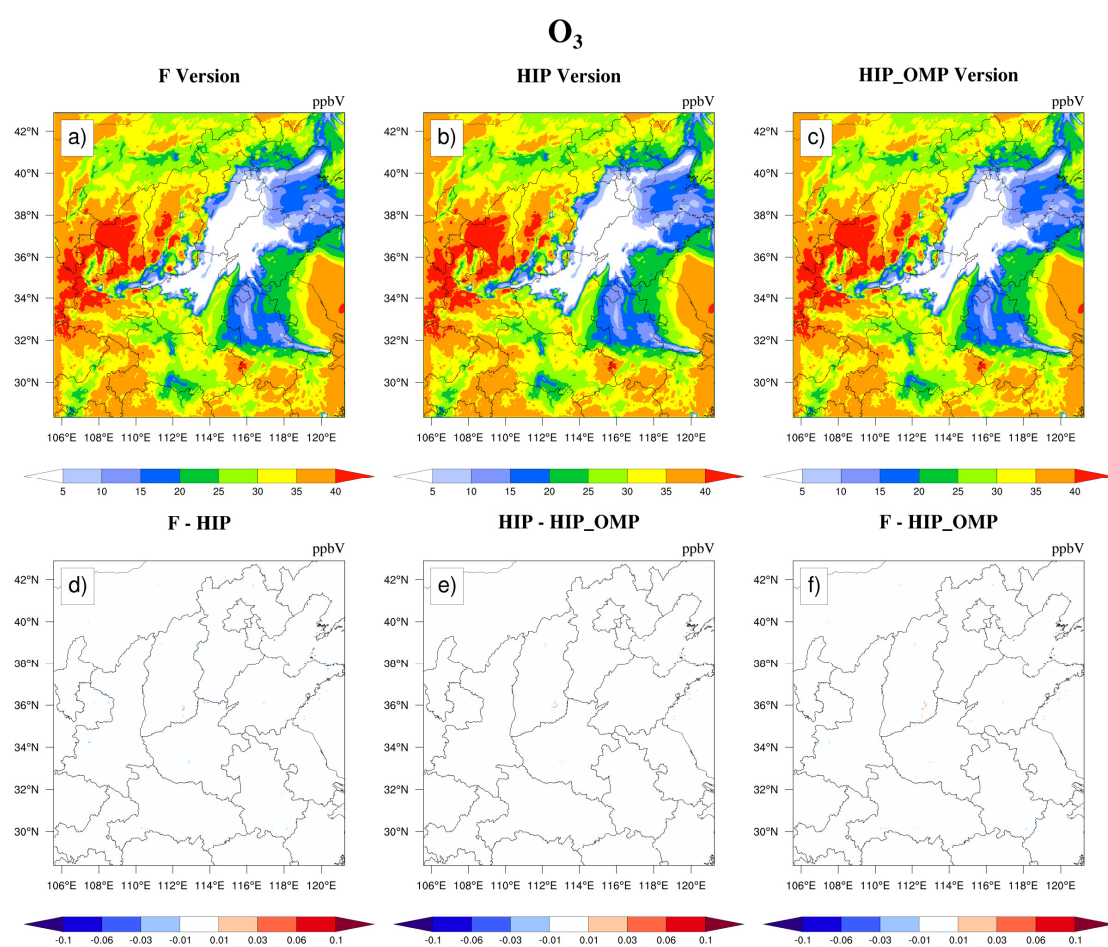

**Table S1.** The physical and chemical numerical methods selected during CAMx model simulation.

| Process | Numerical Methods |
|---------|-------------------|
|---------|-------------------|

---

|                                                 |                                                                                      |
|-------------------------------------------------|--------------------------------------------------------------------------------------|
| Horizontal advection                            | PPM (Colella and Woodward, 1984)                                                     |
| Vertical diffusion                              | K-theory 1 <sup>st</sup> order closure                                               |
| Aqueous-phase oxidation                         | Regional Acid Deposition Model<br>(RADM-AQ, (Chang et al., 1987))                    |
| Inorganic aerosol<br>thermodynamic partitioning | ISORROPIA (Nenes et al., 1999)                                                       |
| Gas-Phase Chemistry                             | Carbon Bond 2005 (Yarwood et al., 2005)<br>EBI solver (Hertel et al., 1993)          |
| Dry deposition                                  | Resistance model for gases (Zhang et al., 2003)<br>and aerosols (Zhang et al., 2001) |
| Wet deposition                                  | Scavenging model for gases<br>and aerosols (Seinfeld et al., 1998)                   |

---

## Reference

- Chang, J. S., Brost, R. A., Isaksen, I. S. A., Madronich, S., Middleton, P., Stockwell, W. R., and Walcek, C. J.: A three-dimensional Eulerian acid deposition model: Physical concepts and formulation, *Journal of Geophysical Research: Atmospheres*, 92, 14681-14700, <https://doi.org/10.1029/JD092iD12p14681>, 1987.
- Colella, P. and Woodward, P. R.: The Piecewise Parabolic Method (PPM) for gas-dynamical simulations, *Journal of Computational Physics*, 54, 174-201, [https://doi.org/10.1016/0021-9991\(84\)90143-8](https://doi.org/10.1016/0021-9991(84)90143-8), 1984.
- Hertel, O., Berkowicz, R., Christensen, J., and Hov, Ø.: Test of two numerical schemes for use in atmospheric transport-chemistry models, *Atmospheric Environment. Part A. General Topics*, 27, 2591-2611, [https://doi.org/10.1016/0960-1686\(93\)90032-T](https://doi.org/10.1016/0960-1686(93)90032-T), 1993.
- Nenes, A., Pandis, S. N., and Pilinis, C.: Continued development and testing of a new thermodynamic aerosol module for urban and regional air quality models, *Atmospheric Environment*, 33, 1553-1560, [https://doi.org/10.1016/S1352-2310\(98\)00352-5](https://doi.org/10.1016/S1352-2310(98)00352-5), 1999.
- Seinfeld, J. H., Pandis, S. N., and Noone, K. J. J. P. T.: *Atmospheric Chemistry and Physics: From Air Pollution to Climate Change*, 51, 88-90, 1998.

Yarwood, G., Rao, S., Yocke, M., and Whitten, G.: Updates to the carbon bond chemical mechanism: CB05 final report to the US EPA, RT-0400675, 2005.

Zhang, L., Brook, J. R., and Vet, R.: A revised parameterization for gaseous dry deposition in air-quality models, *Atmos. Chem. Phys.*, 3, 2067-2082, 10.5194/acp-3-2067-2003, 2003.

Zhang, L., Gong, S., Padro, J., and Barrie, L.: A size-segregated particle dry deposition scheme for an atmospheric aerosol module, *Atmospheric Environment*, 35, 549-560, [https://doi.org/10.1016/S1352-2310\(00\)00326-5](https://doi.org/10.1016/S1352-2310(00)00326-5), 2001.
